# Supplementary material for: Silica Shell Thickness-Dependent Fluorescence Properties of SiO2@Ag@SiO2@QDs Nanocomposites
Source: MDPI journal article supplement (doi:10.3390/ijms231710041), 2022-09-02
Supplement: s1 [file s1]

## Supplementary Information

# Silica Shell Thickness-Dependent Fluorescence Properties of SiO<sub>2</sub>@Ag@SiO<sub>2</sub>@QDs Nanocomposites

Eunil Hahm <sup>1</sup>, Ahla Jo <sup>1</sup>, Sang Hun Lee <sup>2</sup>, Homan Kang <sup>3</sup>, Xuan-Hung Pham <sup>1</sup> and Bong-Hyun Jun <sup>1,\*</sup>

<sup>1</sup> Department of Bioscience and Biotechnology, Konkuk University, Seoul 05029, Korea

<sup>2</sup> Department of Chemical and Biological Engineering, Hanbat National University, Deajeon 34158, Korea

<sup>3</sup> Gordon Center for Medical Imaging, Department of Radiology, Massachusetts General Hospital, Harvard Medical School, Boston, MA 02114, USA

\* Correspondence: [bjun@konkuk.ac.kr](mailto:bjun@konkuk.ac.kr); Tel.: +82-2-450-0521

**Keywords:** fluorescence; silica shell; fine control; shell thickness; assembled structures; MEF; PRET

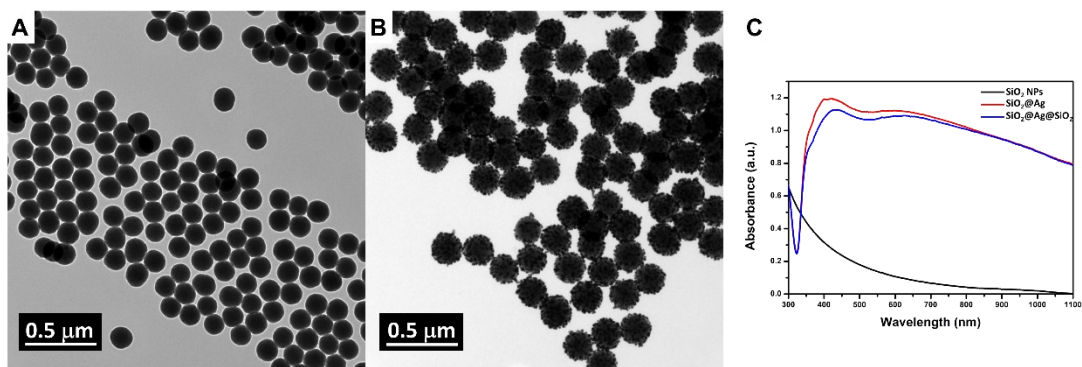

**Figure S1.** TEM images of (A) SiO<sub>2</sub> NPs and (B) SiO<sub>2</sub>@Ag. (C) Absorbance spectra of the SiO<sub>2</sub> NPs, SiO<sub>2</sub>@Ag, and typical SiO<sub>2</sub>@Ag@SiO<sub>2</sub>.

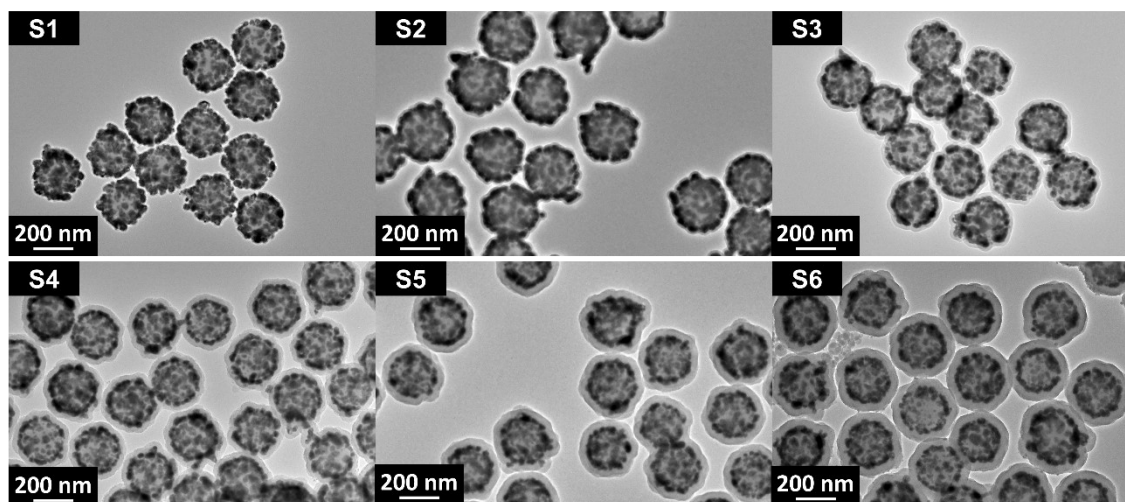

Figure S2. Low-magnification TEM images of  $\text{SiO}_2@\text{Ag}@\text{SiO}_2$  with various silica shell thicknesses on the  $\text{SiO}_2@\text{Ag}$  surface (S1:  $4 \pm 0.3$  nm, S2:  $9 \pm 1.1$  nm, S3:  $13 \pm 1.2$  nm, S4:  $16 \pm 1.0$  nm, S5:  $24 \pm 1.3$  nm, and S6:  $38 \text{ nm} \pm 2.0$  nm).

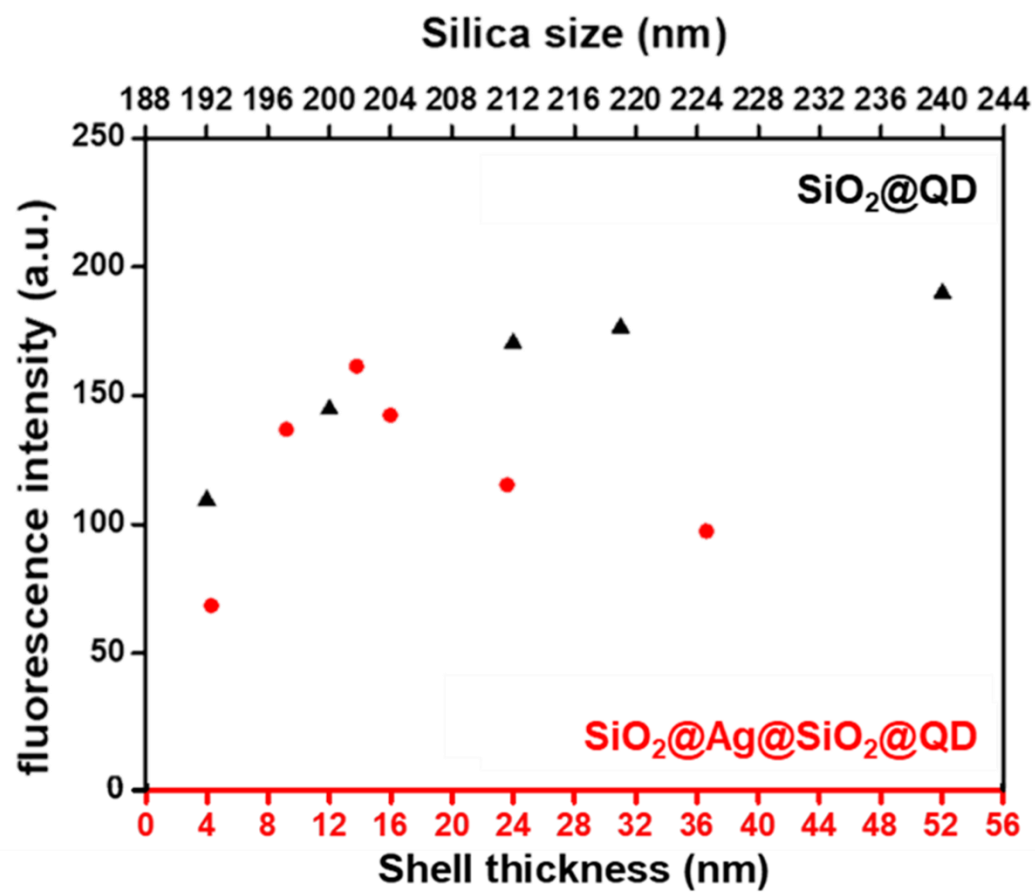

Figure S3. Comparison of the fluorescence properties of the  $\text{SiO}_2@\text{Ag}@\text{SiO}_2@\text{QDs}$  and  $\text{SiO}_2@\text{QDs}$ .
